# Supplementary material for: Emerging investigator series: hetero-phase junction 1T/2H-MoS2 nanosheets decorated by FeOOH nanoparticles for enhanced visible light photo-Fenton degradation of antibiotics
Source: Royal Society of Chemistry journal article supplement (doi:10.1039/d2en00045h), 2022-01-01
Supplement: d2en00045h1.pdf [file d2en00045h1.pdf]

**Supporting Information for**

**Emerging investigator series: Hetero-phase junction 1T/2H-MoS<sub>2</sub> nanosheets decorated by FeOOH nanoparticles for enhanced visible light photo-Fenton degradation of antibiotic**

Linxiao Sun, Xianjun Tan, Wenhui Ding, Yuxiong Huang\*

Tsinghua-Berkeley Shenzhen Institute (TBSI), Shenzhen International Graduate

School (SIGS), Tsinghua University, Shenzhen 518055, R.P. China.

***Corresponding author:*** Yuxiong Huang

**Email:** huang\_yuxiong@sz.tsinghua.edu.cn

**Tel:** +86 0755 2640 3079

## CONTENTS

Figure S1. Synthesis route of 1T/2H-MoS<sub>2</sub>@FeOOH.

Figure S2. (A) SEM image and (B) XRD spectrum of MoO<sub>3</sub>.

Figure S3. (A) SEM image, (B-C) XPS spectra, (D) XRD image, and (E-H) EDS mapping of 1T/2H-MoS<sub>2</sub>@FeOOH.

Figure S4. XPS spectra of (A) Mo3d and (B) S2p in 2H-MoS<sub>2</sub>.

Figure S5. The electronic structures of (A) 2H-MoS<sub>2</sub> and (B) 1T/2H-MoS<sub>2</sub>.

Figure S6. Distribution of Mo d orbitals of 2H-MoS<sub>2</sub> and 1T-MoS<sub>2</sub>.

Figure S7. (A) Degradation performances of FeOOH and Fe<sup>3+</sup> [Reaction conditions: 40 mL SMZ (10 mg/L), 4 mg catalyst, 10 mM H<sub>2</sub>O<sub>2</sub>]; (B) Degradation kinetics of the photo-Fenton and Fenton systems; (C) Degradation performances of MoS<sub>2</sub>.

Figure S8. (A) Recycling capability of 1T/2H-MoS<sub>2</sub>@FeOOH in photo-Fenton system; (B) TOC reduction of 1T/2H-MoS<sub>2</sub>@FeOOH in photo-Fenton system.

Figure S9. (A) Fe<sup>2+</sup> and Fe<sup>3+</sup> concentrations and (B) H<sub>2</sub>O<sub>2</sub> consumption during the photo-Fenton reactions.

Figure S10. LC-QTOF MS/MS spectra of SMZ degradation intermediate products.

Table S1. Q-TOF MS/MS operation conditions.

Table S2. Molecular information of SMZ degradation intermediates determined by LC-QTOF MS/MS.

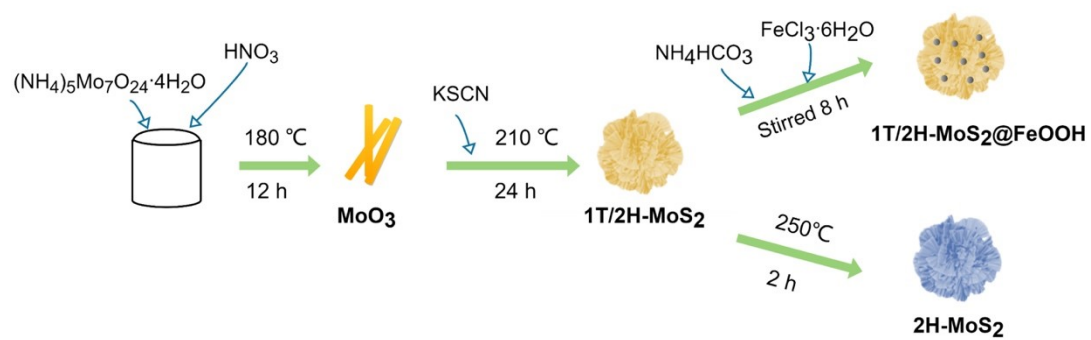

Figure S1. Synthesis route of  $1\text{T}/2\text{H-MoS}_2@\text{FeOOH}$ .

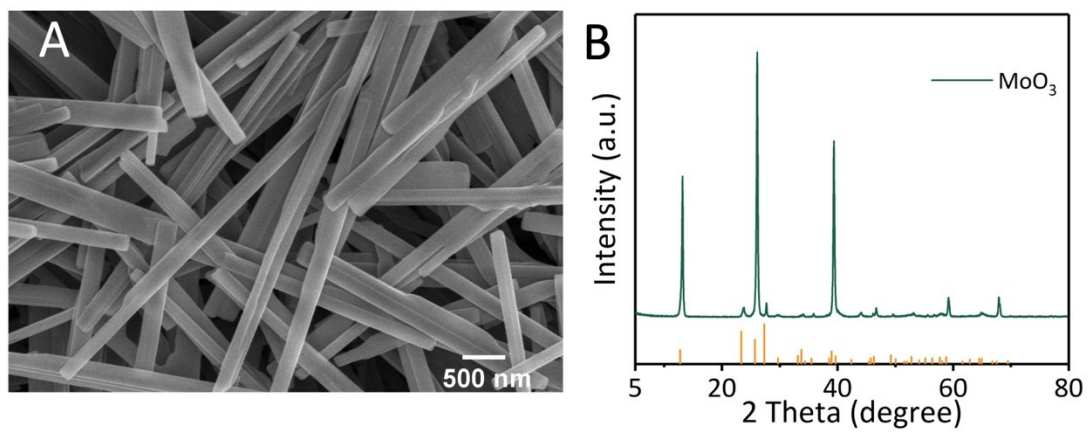

Figure S2. (A) SEM image and (B) XRD spectrum of  $\text{MoO}_3$ .

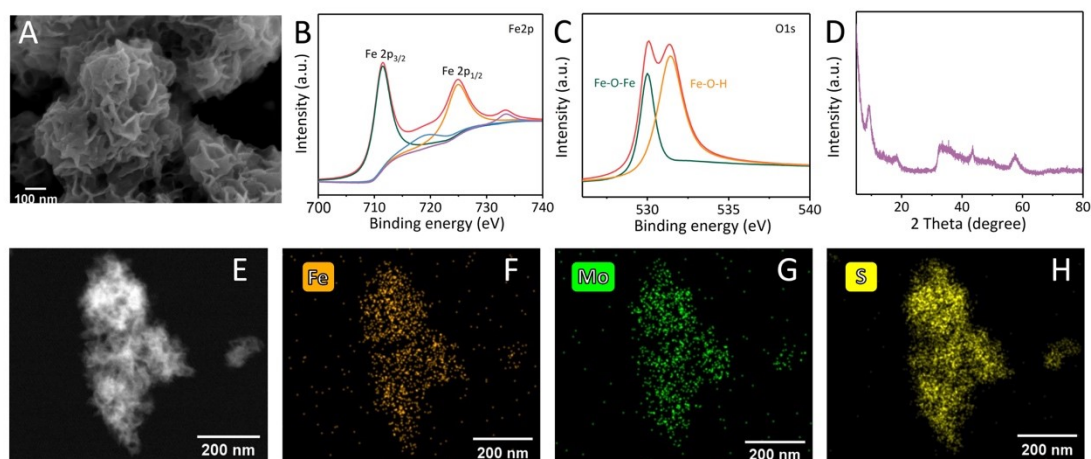

Figure S3. (A) SEM image, (B-C) XPS spectra, (D) XRD image, and (E-H) EDS mapping of 1T/2H-MoS<sub>2</sub>@FeOOH.

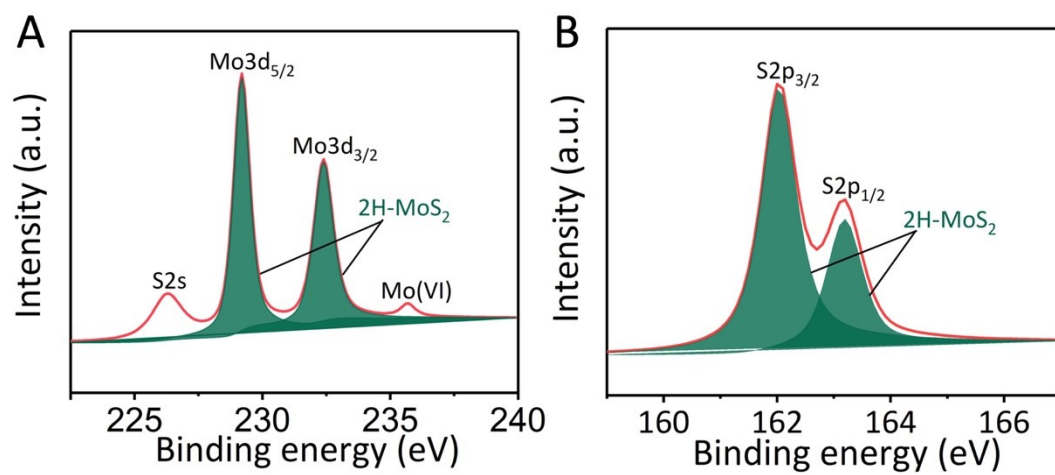

Figure S4. XPS spectra of (A) Mo3d and (B) S2p in 2H-MoS<sub>2</sub>.

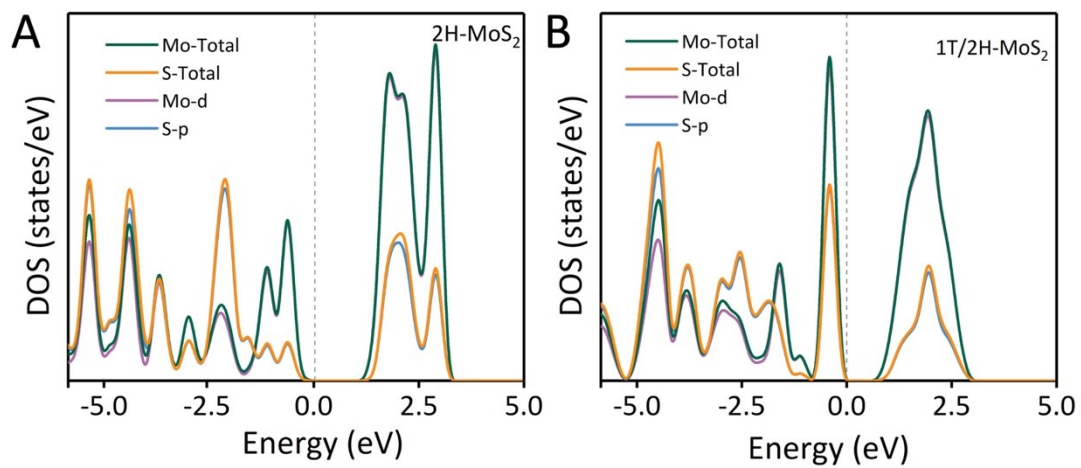

Figure S5. The electronic structures of (A) 2H-MoS<sub>2</sub> and (B) 1T/2H-MoS<sub>2</sub>.

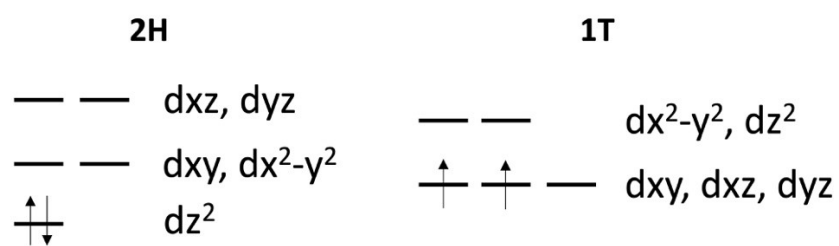

Figure S6. Distribution of Mo d orbitals of 2H-MoS<sub>2</sub> and 1T-MoS<sub>2</sub>.



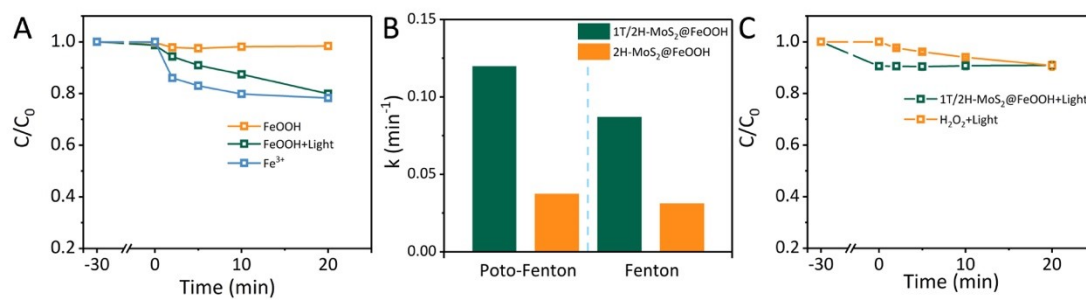

Figure S7. (A) Degradation performances of FeOOH and Fe<sup>3+</sup> [Reaction conditions: 40 mL SMZ (10 mg/L), 4 mg catalyst, 10 mM H<sub>2</sub>O<sub>2</sub>]; (B) Degradation kinetics of the photo-Fenton and Fenton systems; (C) Degradation performances of MoS<sub>2</sub>.

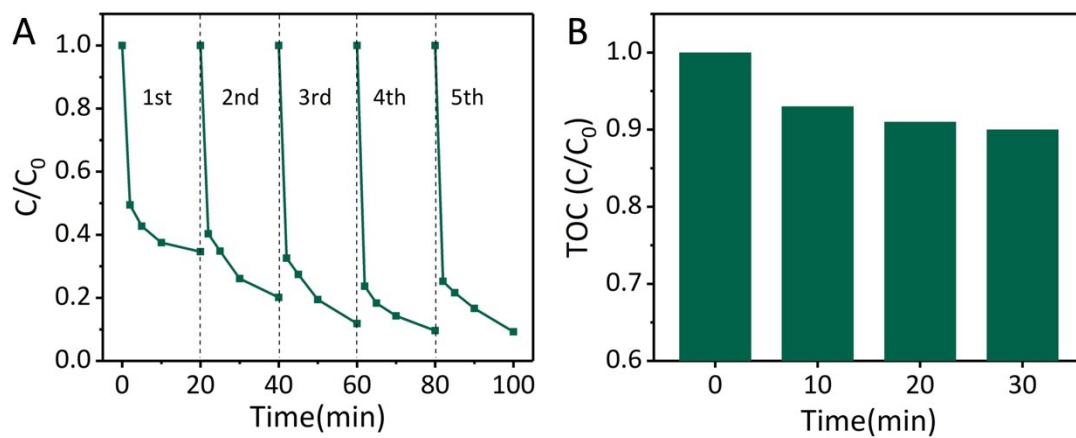

Figure S8. (A) Recycling capability of 1T/2H-MoS<sub>2</sub>@FeOOH in photo-Fenton system; (B) TOC reduction of 1T/2H-MoS<sub>2</sub>@FeOOH in photo-Fenton system.

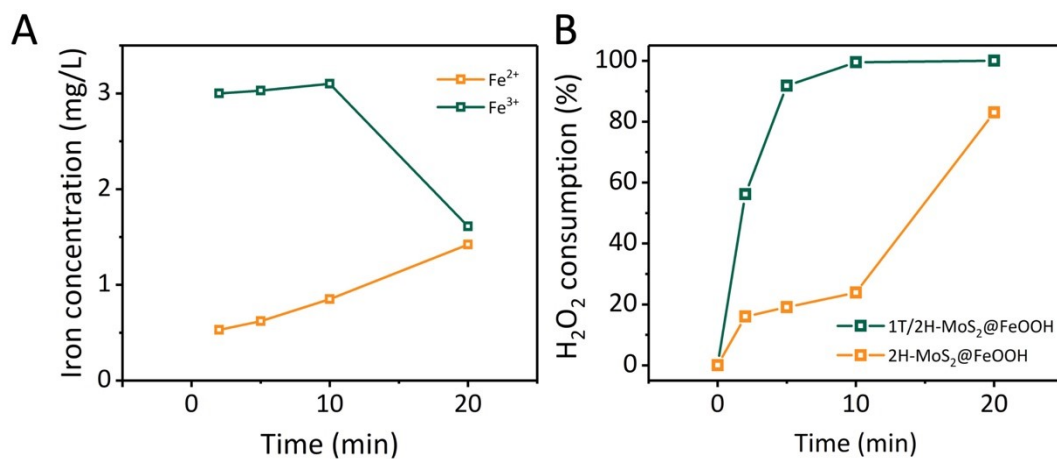

Figure S9. (A)  $\text{Fe}^{2+}$  and  $\text{Fe}^{3+}$  concentrations and (B)  $\text{H}_2\text{O}_2$  consumption during the photo-Fenton reactions.

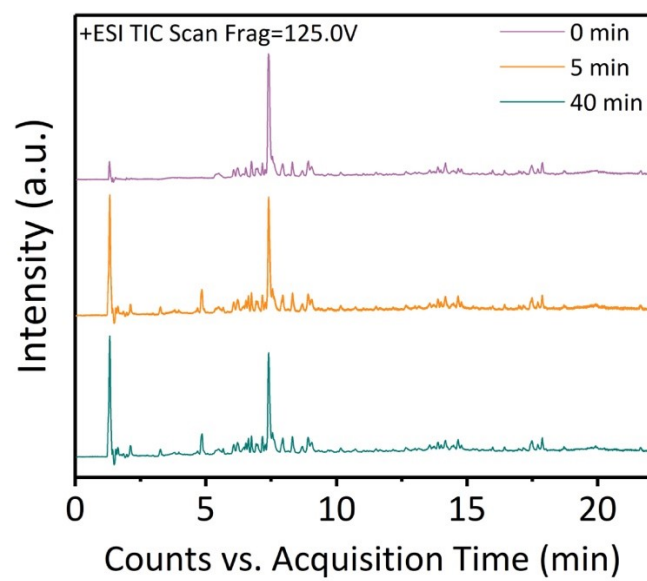

Figure S10. LC-QTOF MS/MS spectra of SMZ degradation intermediate products.

Table S1. Q-TOF MS/MS operation conditions.

| Items                  | Conditions         |
|------------------------|--------------------|
| Ion Mode               | Jet Stream ESI Pos |
| Drying Gas Temperature | 300 °C             |
| Drying Gas Flow        | 11 L/min           |
| Nebulizer Pressure     | 45 psi             |
| Sheath Gas Temperature | 300°C              |
| Sheath Gas Flow        | 11 L/min           |
| Capillary voltage      | 4000V              |
| Nozzle voltage         | 300 V              |
| Scan Speed             | 1.5 spectra/sec    |

Table S2. Molecular information of SMZ degradation intermediates determined by LC-QTOF MS/MS.

| Formular              | ESI(+) m/z | Retention time (min) | Molecular structure |
|-----------------------|------------|----------------------|---------------------|
| $C_{10}H_{11}N_3O_3S$ | 254        | 7.35                 |                     |
| $C_{10}H_9N_3O_4S$    | 268        | 6.40                 |                     |
| $C_6H_7NO_3S$         | 174        | 2.97                 |                     |
| $C_7H_{16}N_2O_7S$    | 273        | 4.60                 |                     |
| $C_{10}H_{13}N_3O_5S$ | 288        | 4.66                 |                     |
| $C_8H_9N_3O_4S$       | 244        | 3.27                 |                     |
| $C_4H_6N_2O_4S$       | 179        | 1.91                 |                     |
| $C_{10}H_{11}N_3O_4S$ | 270        | 7.18                 |                     |

|                       |     |      |                                                                                    |
|-----------------------|-----|------|------------------------------------------------------------------------------------|
| $C_{10}H_{11}N_3O_4S$ | 270 | 5.83 | 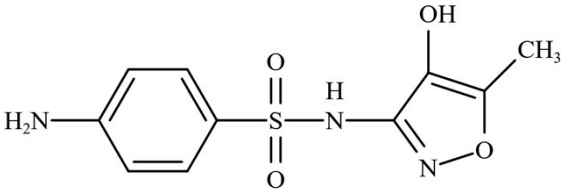 |
| $C_{10}H_{11}N_3O_4S$ | 270 | 4.66 |  |
| $C_4H_6N_2O$          | 99  | 4.88 |  |
| $C_4H_{11}NO$         | 90  | 1.57 |  |
